# Supplementary material for: Spatiotemporal Analysis of Soil Quality Degradation and Emissions in the State of Iowa (USA)
Source: MDPI journal article supplement (doi:10.3390/land13040547), 2024-04-19
Supplement: s1 [file s1]

**Table S1.** Soil diversity (pedodiversity) is expressed as taxonomic diversity at the level of soil order in the state of Iowa (IA) (USA).

| Stocks                      |                                            | Area (2016)        | Proportion (2016) |
|-----------------------------|--------------------------------------------|--------------------|-------------------|
| Soil Order                  | General Characteristics and Constraints    | (km <sup>2</sup> ) | (%)               |
| <b>Slightly Weathered</b>   |                                            | <b>21,424.7</b>    | <b>15.0</b>       |
| Entisols                    | Embryonic soils with ochric epipedon       | 9195.7             | 6.4               |
| Inceptisols                 | Young soils with ochric or umbric epipedon | 12,080.7           | 8.5               |
| Histosols                   | Organic soils with ≥ 20% of organic carbon | 148.4              | 0.1               |
| <b>Moderately Weathered</b> |                                            | <b>121,376.2</b>   | <b>85.0</b>       |
| Alfisols                    | Clay-enriched B horizon with B.S. ≥ 35%    | 34,090.3           | 23.9              |
| Mollisols                   | Carbon-enriched soils with B.S. ≥ 50%      | 86,991.2           | 60.9              |
| Vertisols                   | Soils with swelling clays                  | 294.7              | 0.2               |
| <b>Total</b>                |                                            | <b>142,801.0</b>   | <b>100%</b>       |

Note: B.S. = base saturation. Entisols, Inceptisols, Alfisols, Mollisols, and Vertisols are mineral soils. Histosols are mostly organic soils.

**Table S2.** An overview of the accounting framework used by this study (adapted from Groshans et al. (2019) [26]) for the state of Iowa (IA) (USA).

| OWNERSHIP (e.g., government, private, foreign, shared, single, etc.) |                                                                                                                            |                                             |                                                                                                                                                                                                                    |                                                                                                                 |
|----------------------------------------------------------------------|----------------------------------------------------------------------------------------------------------------------------|---------------------------------------------|--------------------------------------------------------------------------------------------------------------------------------------------------------------------------------------------------------------------|-----------------------------------------------------------------------------------------------------------------|
| Time<br>(e.g., information disclosure, etc.)                         | STOCKS / SOURCE ATTRIBUTION                                                                                                |                                             | FLOWS / LAND USE, CHANGE                                                                                                                                                                                           |                                                                                                                 |
|                                                                      | Biophysical Accounts<br>(Science-Based)                                                                                    | Administrative Accounts<br>(Boundary-Based) | Monetary Account(s)                                                                                                                                                                                                | Benefit(s)/ Damages                                                                                             |
|                                                                      | Soil extent:                                                                                                               | Administrative extent:                      | Ecosystem good(s) and service(s):                                                                                                                                                                                  | Sector:                                                                                                         |
|                                                                      | <b>Composite (total) stock:</b> Total soil carbon (TSC) = Soil organic carbon (SOC) + Soil inorganic carbon (SIC)          |                                             |                                                                                                                                                                                                                    |                                                                                                                 |
| <b>Past</b><br>(e.g., post-development disclosures)                  | - Soil orders (Entisols, Inceptisols, Histosols, Alfisols, Mollisols, Vertisols)<br>- State (Iowa); - County (99 counties) |                                             | Environment;<br>Soil health                                                                                                                                                                                        | "Avoided" or "realized" social cost of carbon (SC-CO <sub>2</sub> ) emissions<br><b>(carbon footprint, CF):</b> |
| <b>Current</b> (e.g., status)                                        |                                                                                                                            |                                             | - Regulation (e.g., carbon sequestration);<br>- Provisioning (e.g., food production)                                                                                                                               | - Carbon gain (sequestration);<br>- Carbon loss                                                                 |
| <b>Future</b><br>(e.g., pre-development disclosures)                 |                                                                                                                            |                                             | <b>Conflicts of Interest (COI)</b><br><b>Soil Quality = Inherent Soil Quality (Soil Suitability) + Dynamic Soil Quality (Soil Health)</b><br><b>Loss and Damage (L&amp;D)</b><br><b>Liability (Responsibility)</b> |                                                                                                                 |

**Table S3.** Area-normalized content ( $\text{kg m}^{-2}$ ) and monetary values ( $\$ \text{m}^{-2}$ ) of soil organic carbon (SOC), soil inorganic carbon (SIC), and total soil carbon (TSC = SOC + SIC) by soil order using data developed by Guo et al. (2006) [29] for the upper 2-m of soil and an avoided social cost of carbon (SC- $\text{CO}_2$ ) of \$46 per metric ton of  $\text{CO}_2$ , applicable for 2025 (2007 U.S. dollars with an average discount rate of 3% [27]).

| Soil Order  | SOC Content ( $\text{kg m}^{-2}$ )<br>SOC Value ( $\$ \text{m}^{-2}$ ) | SIC Content ( $\text{kg m}^{-2}$ )<br>SIC Value ( $\$ \text{m}^{-2}$ ) | TSC Content ( $\text{kg m}^{-2}$ )<br>TSC Value ( $\$ \text{m}^{-2}$ ) |
|-------------|------------------------------------------------------------------------|------------------------------------------------------------------------|------------------------------------------------------------------------|
|             | Minimum—Midpoint—Maximum Values                                        |                                                                        |                                                                        |
| Entisols    | 1.8–8.0–15.8<br>0.30–1.35–2.66                                         | 1.9–4.8–8.4<br>0.32–0.82–1.42                                          | 3.7–12.8–24.2<br>0.62–2.17–4.08                                        |
| Inceptisols | 2.8–8.9–17.4<br>0.47–1.50–2.93                                         | 2.5–5.1–8.4<br>0.42–0.86–1.42                                          | 5.3–14.0–25.8<br>0.89–2.36–4.35                                        |
| Histosols   | 63.9–140.1–243.9<br>10.78–23.62–41.14                                  | 0.6–2.4–5.0<br>0.10–0.41–0.84                                          | 64.5–142.5–248.9<br>10.88–24.03–41.98                                  |
| Alfisols    | 2.3–7.5–14.1<br>0.39–1.27–2.38                                         | 1.3–4.3–8.1<br>0.22–0.72–1.37                                          | 3.6–11.8–22.2<br>0.61–1.99–3.74                                        |
| Mollisols   | 5.9–13.5–22.8<br>1.00–2.28–3.85                                        | 4.9–11.5–19.7<br>0.83–1.93–3.32                                        | 10.8–25.0–42.5<br>1.82–4.21–7.17                                       |
| Vertisols   | 5.4–14.7–25.5<br>0.91–2.48–4.30                                        | 10.3–23.2–38.3<br>1.74–3.91–6.46                                       | 15.7–37.9–63.8<br>2.65–6.39–10.76                                      |

Note: Entisols, Inceptisols, Alfisols, Mollisols, and Vertisols are mineral soils. Histosols are mostly organic soils.

**Table S4.** Distribution of soil carbon regulating ecosystem services in the state of Iowa (IA) (USA) by soil order.

| Parameter                              | 2016 Total           | Degree of Weathering and Soil Development |                      |                      |                      |                      |                      |
|----------------------------------------|----------------------|-------------------------------------------|----------------------|----------------------|----------------------|----------------------|----------------------|
|                                        |                      | Slight                                    |                      |                      | Moderate             |                      |                      |
|                                        |                      | Entisols                                  | Inceptisols          | Histosols            | Alfisols             | Mollisols            | Vertisols            |
| 2016 Area ( $\text{km}^2$ )            | 142,801.0            | 9195.7                                    | 12,080.7             | 148.4                | 34,090.3             | 86,991.2             | 294.7                |
| <b>Soil organic carbon (SOC):</b>      |                      |                                           |                      |                      |                      |                      |                      |
| Minimum (kg)                           | $6.5 \times 10^{11}$ | $1.7 \times 10^{10}$                      | $3.4 \times 10^{10}$ | $9.5 \times 10^9$    | $7.8 \times 10^{10}$ | $5.1 \times 10^{11}$ | $1.6 \times 10^9$    |
| Midpoint (kg)                          | $1.6 \times 10^{12}$ | $7.4 \times 10^{10}$                      | $1.1 \times 10^{11}$ | $2.1 \times 10^{10}$ | $2.6 \times 10^{11}$ | $1.2 \times 10^{12}$ | $4.3 \times 10^9$    |
| Maximum (kg)                           | $2.9 \times 10^{12}$ | $1.5 \times 10^{11}$                      | $2.1 \times 10^{11}$ | $3.6 \times 10^{10}$ | $4.8 \times 10^{11}$ | $2.0 \times 10^{12}$ | $7.5 \times 10^9$    |
| Minimum (SC- $\text{CO}_2$ , \$, USD)  | $1.1 \times 10^{11}$ | $2.8 \times 10^9$                         | $5.7 \times 10^9$    | $1.6 \times 10^9$    | $1.3 \times 10^{10}$ | $8.7 \times 10^{10}$ | $2.7 \times 10^8$    |
| Midpoint (SC- $\text{CO}_2$ , \$, USD) | $2.8 \times 10^{11}$ | $1.2 \times 10^{10}$                      | $1.8 \times 10^{10}$ | $3.5 \times 10^9$    | $4.3 \times 10^{10}$ | $2.0 \times 10^{11}$ | $7.3 \times 10^8$    |
| Maximum (SC- $\text{CO}_2$ , \$, USD)  | $4.8 \times 10^{11}$ | $2.4 \times 10^{10}$                      | $3.5 \times 10^{10}$ | $6.1 \times 10^9$    | $8.1 \times 10^{10}$ | $3.3 \times 10^{11}$ | $1.3 \times 10^9$    |
| <b>Soil inorganic carbon (SIC):</b>    |                      |                                           |                      |                      |                      |                      |                      |
| Minimum (kg)                           | $5.2 \times 10^{11}$ | $1.7 \times 10^{10}$                      | $3.0 \times 10^{10}$ | $8.9 \times 10^7$    | $4.4 \times 10^{10}$ | $4.3 \times 10^{11}$ | $3.0 \times 10^9$    |
| Midpoint (kg)                          | $4.7 \times 10^{11}$ | $4.4 \times 10^{10}$                      | $4.7 \times 10^{10}$ | $2.2 \times 10^{10}$ | $4.0 \times 10^{10}$ | $1.1 \times 10^{11}$ | $2.1 \times 10^{11}$ |
| Maximum (kg)                           | $2.2 \times 10^{12}$ | $7.7 \times 10^{10}$                      | $1.0 \times 10^{11}$ | $7.4 \times 10^8$    | $2.8 \times 10^{11}$ | $1.7 \times 10^{12}$ | $1.1 \times 10^{10}$ |
| Minimum (SC- $\text{CO}_2$ , \$, USD)  | $8.8 \times 10^{10}$ | $2.9 \times 10^9$                         | $5.1 \times 10^9$    | $1.5 \times 10^7$    | $7.5 \times 10^9$    | $7.2 \times 10^{10}$ | $5.1 \times 10^8$    |
| Midpoint (SC- $\text{CO}_2$ , \$, USD) | $2.1 \times 10^{11}$ | $7.5 \times 10^9$                         | $1.0 \times 10^{10}$ | $6.1 \times 10^7$    | $2.5 \times 10^{10}$ | $1.7 \times 10^{11}$ | $1.2 \times 10^9$    |
| Maximum (SC- $\text{CO}_2$ , \$, USD)  | $3.7 \times 10^{11}$ | $1.3 \times 10^{10}$                      | $1.7 \times 10^{10}$ | $1.2 \times 10^8$    | $4.7 \times 10^{10}$ | $2.9 \times 10^{11}$ | $1.9 \times 10^9$    |
| <b>Total soil carbon (TSC):</b>        |                      |                                           |                      |                      |                      |                      |                      |
| Minimum (kg)                           | $1.2 \times 10^{12}$ | $3.4 \times 10^{10}$                      | $6.4 \times 10^{10}$ | $9.6 \times 10^9$    | $1.2 \times 10^{11}$ | $9.4 \times 10^{11}$ | $4.6 \times 10^9$    |
| Midpoint (kg)                          | $2.1 \times 10^{12}$ | $1.2 \times 10^{11}$                      | $1.5 \times 10^{11}$ | $4.3 \times 10^{10}$ | $3.0 \times 10^{11}$ | $1.3 \times 10^{12}$ | $2.2 \times 10^{11}$ |
| Maximum (kg)                           | $5.0 \times 10^{12}$ | $2.2 \times 10^{11}$                      | $3.1 \times 10^{11}$ | $3.7 \times 10^{10}$ | $7.6 \times 10^{11}$ | $3.7 \times 10^{12}$ | $1.9 \times 10^{10}$ |
| Minimum (SC- $\text{CO}_2$ , \$, USD)  | $2.0 \times 10^{11}$ | $5.7 \times 10^9$                         | $1.1 \times 10^{10}$ | $1.6 \times 10^9$    | $2.1 \times 10^{10}$ | $1.6 \times 10^{11}$ | $7.8 \times 10^8$    |
| Midpoint (SC- $\text{CO}_2$ , \$, USD) | $4.9 \times 10^{11}$ | $2.0 \times 10^{10}$                      | $2.9 \times 10^{10}$ | $3.6 \times 10^9$    | $6.8 \times 10^{10}$ | $3.7 \times 10^{11}$ | $1.9 \times 10^9$    |
| Maximum (SC- $\text{CO}_2$ , \$, USD)  | $8.5 \times 10^{11}$ | $3.8 \times 10^{10}$                      | $5.3 \times 10^{10}$ | $6.2 \times 10^9$    | $1.3 \times 10^{11}$ | $6.2 \times 10^{11}$ | $3.2 \times 10^9$    |

**Table S5.** Anthropogenic land degradation status and potential land for nature-based solutions in the state of Iowa (IA) in the contiguous United States of America (USA) in 2016. Percent changes in area from 2001 to 2016 are shown in parentheses. Reported values have been rounded; therefore, calculated sums and percentages may exhibit minor discrepancies. This table shows the anthropogenic land degradation status in 2016 but most likely does not account for historical anthropogenic land degradation as well as most of the inherent land degradation.

| County      | Total Area (km <sup>2</sup> ) | Carbon Index (CI) | Anthropogenically Degraded Land | Proportion from Total | Types of Anthropogenic Degradation |                    |                    | Potential Land for Nature-Based Solutions |
|-------------|-------------------------------|-------------------|---------------------------------|-----------------------|------------------------------------|--------------------|--------------------|-------------------------------------------|
|             |                               |                   |                                 |                       | Barren                             | Developed          | Agriculture        |                                           |
|             |                               |                   | (km <sup>2</sup> )              | (%)                   | (km <sup>2</sup> )                 | (km <sup>2</sup> ) | (km <sup>2</sup> ) | (km <sup>2</sup> )                        |
| Adair       | 1464                          | 33 (15)           | 1411 (−0.1)                     | 96                    | 0.4 (−0.4)                         | 65 (+0.5)          | 1345 (−0.1)        | 4 (+7.9)                                  |
| Adams       | 1088                          | 33 (16)           | 1006 (−0.1)                     | 92                    | 0.3 (−4.6)                         | 44 (+0.3)          | 962 (−0.1)         | 5 (+11.8)                                 |
| Allamakee   | 1598                          | 18 (10)           | 975 (0)                         | 61                    | 0.8 (+0.7)                         | 68 (+1.5)          | 907 (−0.2)         | 32 (+6.4)                                 |
| Appanoose   | 1270                          | 24 (13)           | 924 (−0.9)                      | 73                    | 2.0 (+298.6)                       | 62 (+0.9)          | 860 (−1.2)         | 15 (+106.2)                               |
| Audubon     | 1144                          | 33 (16)           | 1129 (0)                        | 99                    | 0.5 (−18.2)                        | 49 (+0.7)          | 1080 (0)           | 2 (−5.5)                                  |
| Benton      | 1845                          | 34 (10)           | 1710 (+0.4)                     | 93                    | 0.2 (−5.0)                         | 105 (+2.3)         | 1606 (+0.3)        | 33 (−18.6)                                |
| Black Hawk  | 1424                          | 33 (17)           | 1304 (+0.4)                     | 92                    | 0.7 (+0.5)                         | 170 (+11.3)        | 1134 (−1.0)        | 22 (−18.5)                                |
| Boone       | 1472                          | 34 (23)           | 1305 (0)                        | 89                    | 1.2 (+37.8)                        | 87 (+4.6)          | 1217 (−0.3)        | 17 (−0.6)                                 |
| Bremer      | 1119                          | 35 (17)           | 993 (+0.1)                      | 89                    | 0.3 (+10.2)                        | 70 (+4.9)          | 923 (−0.3)         | 22 (−4.0)                                 |
| Buchanan    | 1473                          | 34 (20)           | 1385 (0)                        | 94                    | 0.4 (−3.4)                         | 85 (+2.7)          | 1299 (−0.1)        | 15 (−0.2)                                 |
| Buena Vista | 1482                          | 39 (18)           | 1445 (−0.1)                     | 98                    | 1.2 (−1.9)                         | 80 (+2.5)          | 1364 (−0.2)        | 9 (+1.1)                                  |
| Butler      | 1491                          | 34 (17)           | 1378 (+0.1)                     | 92                    | 0.4 (+7.3)                         | 74 (+2.1)          | 1304 (0)           | 26 (−6.0)                                 |
| Calhoun     | 1473                          | 40 (20)           | 1450 (−0.1)                     | 98                    | 0.4 (−2.5)                         | 75 (+7.3)          | 1374 (−0.4)        | 7 (−5.6)                                  |
| Carroll     | 1471                          | 34 (20)           | 1445 (0)                        | 98                    | 0.8 (−8.4)                         | 84 (+2.2)          | 1360 (−0.1)        | 7 (−5.9)                                  |
| Cass        | 1455                          | 36 (17)           | 1421 (0)                        | 98                    | 0.3 (−10.0)                        | 74 (+2.2)          | 1347 (−0.1)        | 5 (−9.3)                                  |
| Cedar       | 1492                          | 32 (16)           | 1359 (+0.2)                     | 91                    | 0.2 (−19.0)                        | 78 (+2.3)          | 1281 (0)           | 15 (−11.6)                                |
| Cerro Gordo | 1456                          | 34 (16)           | 1379 (+0.2)                     | 95                    | 1.1 (+12.6)                        | 116 (+5.0)         | 1263 (−0.2)        | 32 (−10.0)                                |
| Cherokee    | 1484                          | 39 (19)           | 1413 (−0.1)                     | 95                    | 0.8 (−8.8)                         | 72 (+1.4)          | 1340 (−0.2)        | 23 (+2.6)                                 |
| Chickasaw   | 1298                          | 34 (18)           | 1181 (+0.1)                     | 91                    | 0.3 (−17.6)                        | 66 (+1.7)          | 1115 (+0.1)        | 38 (−4.6)                                 |
| Clarke      | 1108                          | 27 (12)           | 882 (−0.6)                      | 80                    | 0.1 (+16.3)                        | 48 (+2.3)          | 834 (−0.8)         | 5 (+98.5)                                 |
| Clay        | 1465                          | 39 (15)           | 1374 (0)                        | 94                    | 0.6 (+10.6)                        | 74 (+2.0)          | 1299 (−0.2)        | 23 (−2.5)                                 |
| Clayton     | 1995                          | 18 (16)           | 1368 (−0.1)                     | 69                    | 1.0 (+0.6)                         | 88 (+0.9)          | 1280 (−0.1)        | 49 (+7.5)                                 |
| Clinton     | 1787                          | 26 (10)           | 1595 (+0.6)                     | 89                    | 0.6 (−6.7)                         | 121 (+4.0)         | 1473 (+0.3)        | 24 (−28.4)                                |
| Crawford    | 1842                          | 30 (13)           | 1781 (+0.3)                     | 97                    | 0.5 (−2.7)                         | 88 (+1.7)          | 1692 (+0.2)        | 26 (−14.0)                                |
| Dallas      | 1492                          | 33 (16)           | 1321 (0)                        | 89                    | 2.3 (−1.3)                         | 133 (+31.3)        | 1186 (−2.6)        | 16 (+1.5)                                 |
| Davis       | 1288                          | 23 (10)           | 982 (−0.5)                      | 76                    | 0.2 (−2.2)                         | 53 (+0.5)          | 929 (−0.6)         | 7 (+77.5)                                 |
| Decatur     | 1359                          | 23 (17)           | 1032 (−0.8)                     | 76                    | 0.2 (+6.6)                         | 58 (+0.6)          | 974 (−0.8)         | 8 (+75.3)                                 |
| Delaware    | 1488                          | 28 (23)           | 1321 (+0.1)                     | 89                    | 1.1 (+15.2)                        | 76 (+1.9)          | 1243 (−0.1)        | 32 (−0.2)                                 |
| Des Moines  | 1063                          | 26 (17)           | 806 (0)                         | 76                    | 0.6 (−4.7)                         | 108 (+4.1)         | 698 (−0.6)         | 20 (−1.9)                                 |
| Dickinson   | 972                           | 38 (20)           | 854 (+0.6)                      | 88                    | 0.8 (+9.4)                         | 63 (+5.3)          | 790 (+0.2)         | 71 (−7.5)                                 |
| Dubuque     | 1408                          | 18 (18)           | 1177 (+0.1)                     | 84                    | 1.6 (−12.5)                        | 127 (+10.0)        | 1048 (−0.9)        | 31 (+0.8)                                 |
| Emmet       | 1017                          | 37 (17)           | 960 (+0.1)                      | 94                    | 1.1 (−0.6)                         | 47 (+0.8)          | 912 (+0.1)         | 17 (−8.2)                                 |
| Fayette     | 1819                          | 28 (20)           | 1629 (0)                        | 90                    | 0.5 (−2.5)                         | 95 (+1.4)          | 1534 (−0.1)        | 41 (+0.1)                                 |
| Floyd       | 1283                          | 34 (20)           | 1185 (+0.2)                     | 92                    | 0.3 (−18.5)                        | 72 (+2.2)          | 1112 (0)           | 38 (−4.9)                                 |
| Franklin    | 1501                          | 37 (17)           | 1449 (0)                        | 97                    | 0.6 (−2.3)                         | 75 (+1.8)          | 1373 (0)           | 14 (−5.5)                                 |
| Fremont     | 1315                          | 36 (17)           | 1150 (+0.1)                     | 87                    | 6.3 (+1987.5)                      | 63 (+0.6)          | 1081 (−0.5)        | 33 (+9.7)                                 |
| Greene      | 1465                          | 37 (20)           | 1394 (0)                        | 95                    | 0.5 (+5.2)                         | 67 (+1.8)          | 1327 (−0.1)        | 12 (−3.6)                                 |
| Grundy      | 1298                          | 40 (15)           | 1281 (0)                        | 99                    | 0.2 (−3.9)                         | 64 (+2.6)          | 1216 (−0.1)        | 8 (−2.7)                                  |
| Guthrie     | 1517                          | 31 (16)           | 1328 (0)                        | 88                    | 0.5 (−26.7)                        | 70 (+1.6)          | 1258 (−0.1)        | 11 (+1.8)                                 |
| Hamilton    | 1486                          | 36 (23)           | 1423 (+0.1)                     | 96                    | 0.5 (−6.5)                         | 80 (+3.0)          | 1342 (−0.1)        | 14 (−7.6)                                 |
| Hancock     | 1470                          | 38 (22)           | 1428 (0)                        | 97                    | 0.6 (+2.0)                         | 74 (+1.4)          | 1354 (0)           | 14 (−13.1)                                |
| Hardin      | 1462                          | 36 (19)           | 1372 (0)                        | 94                    | 0.5 (−4.9)                         | 83 (+3.0)          | 1289 (−0.1)        | 18 (−3.8)                                 |
| Harrison    | 1790                          | 30 (16)           | 1530 (+0.8)                     | 85                    | 4.3 (+1287.5)                      | 85 (+0.6)          | 1441 (+0.6)        | 85 (−6.9)                                 |
| Henry       | 1115                          | 26 (12)           | 895 (−0.2)                      | 80                    | 2.1 (+418.5)                       | 70 (+1.4)          | 823 (−0.5)         | 16 (+24.2)                                |
| Howard      | 1221                          | 32 (16)           | 1122 (+0.8)                     | 92                    | 0.3 (−6.0)                         | 54 (+2.1)          | 1067 (+0.8)        | 42 (−18.2)                                |
| Humboldt    | 1117                          | 38 (20)           | 1083 (0)                        | 97                    | 1.0 (+21.8)                        | 52 (+1.3)          | 1029 (−0.1)        | 7 (−6.3)                                  |

|               |                |            |                       |           |                   |                    |                       |                    |
|---------------|----------------|------------|-----------------------|-----------|-------------------|--------------------|-----------------------|--------------------|
| Ida           | 1114           | 36 (17)    | 1094 (+0.7)           | 98        | 0.2 (-2.2)        | 51 (+2.3)          | 1043 (+0.6)           | 13 (-37.0)         |
| Iowa          | 1507           | 27 (15)    | 1257 (+2.7)           | 83        | 0.3 (+29.2)       | 74 (+1.1)          | 1183 (+2.8)           | 92 (-26.7)         |
| Jackson       | 1628           | 16 (9)     | 1166 (+0.7)           | 72        | 0.5 (+3.7)        | 75 (+2.5)          | 1091 (+0.6)           | 44 (-16.5)         |
| Jasper        | 1859           | 31 (16)    | 1728 (+0.2)           | 93        | 0.4 (+7.8)        | 110 (+2.8)         | 1618 (0)              | 24 (-13.6)         |
| Jefferson     | 1119           | 24 (11)    | 891 (-0.2)            | 80        | 0.9 (+686.6)      | 62 (+4.9)          | 827 (-0.6)            | 19 (+7.7)          |
| Johnson       | 1568           | 28 (15)    | 1280 (+0.9)           | 82        | 0.9 (-8.5)        | 166 (+12.8)        | 1114 (-0.6)           | 53 (-15.6)         |
| Jones         | 1477           | 26 (14)    | 1242 (+0.2)           | 84        | 0.5 (-9.6)        | 75 (+3.3)          | 1167 (0)              | 24 (-1.6)          |
| Keokuk        | 1486           | 26 (15)    | 1238 (+2.3)           | 83        | 0.3 (+2.2)        | 69 (+0.4)          | 1168 (+2.5)           | 84 (-25.1)         |
| Kossuth       | 2509           | 40 (23)    | 2439 (0)              | 97        | 2.0 (-1.8)        | 114 (+1.1)         | 2323 (-0.1)           | 18 (-5.3)          |
| Lee           | 1329           | 21 (12)    | 924 (-0.2)            | 70        | 1.2 (+51.2)       | 92 (+6.5)          | 831 (-0.9)            | 19 (+15.7)         |
| Linn          | 1799           | 28 (24)    | 1522 (+0.6)           | 85        | 0.6 (-27.5)       | 238 (+11.8)        | 1283 (-1.2)           | 35 (-16.9)         |
| Louisa        | 1020           | 26 (15)    | 754 (+0.4)            | 74        | 0.4 (+12.2)       | 49 (+1.7)          | 705 (+0.3)            | 60 (-5.2)          |
| Lucas         | 1109           | 25 (12)    | 796 (-0.8)            | 72        | 0.1 (+88.4)       | 49 (+0.7)          | 748 (-0.9)            | 10 (+59.0)         |
| Lyon          | 1509           | 34 (15)    | 1431 (+0.1)           | 95        | 1.7 (-1.7)        | 70 (+1.7)          | 1359 (0)              | 54 (-3.6)          |
| Madison       | 1405           | 30 (16)    | 1176 (-0.2)           | 84        | 0.8 (+18.3)       | 62 (+2.0)          | 1113 (-0.3)           | 10 (+12.0)         |
| Mahaska       | 1455           | 30 (16)    | 1285 (+0.5)           | 88        | 0.8 (+6.1)        | 85 (+2.8)          | 1199 (+0.3)           | 35 (-12.9)         |
| Marion        | 1348           | 25 (12)    | 1045 (-0.2)           | 78        | 4.3 (+120.0)      | 87 (+4.0)          | 954 (-0.8)            | 26 (+20.2)         |
| Marshall      | 1472           | 35 (18)    | 1383 (+0.1)           | 94        | 0.5 (+3.8)        | 95 (+3.5)          | 1287 (-0.2)           | 17 (-5.3)          |
| Mills         | 1124           | 34 (17)    | 1003 (+0.3)           | 89        | 2.6 (+658.8)      | 60 (+3.7)          | 941 (-0.2)            | 38 (+2.2)          |
| Mitchell      | 1207           | 32 (12)    | 1127 (+0.1)           | 93        | 0.5 (-0.9)        | 61 (+3.4)          | 1066 (0)              | 30 (-5.5)          |
| Monona        | 1785           | 31 (15)    | 1527 (+0.7)           | 86        | 3.4 (+1136.2)     | 83 (+0.3)          | 1441 (+0.5)           | 77 (-6.6)          |
| Monroe        | 1094           | 24 (15)    | 735 (-1.0)            | 67        | 0.2 (-55.6)       | 47 (+3.4)          | 688 (-1.3)            | 15 (+53.7)         |
| Montgomery    | 1090           | 35 (14)    | 1026 (+0.1)           | 94        | 0.2 (+24.3)       | 55 (+1.0)          | 971 (+0.1)            | 14 (-11.3)         |
| Muscatine     | 1117           | 27 (15)    | 888 (+0.7)            | 80        | 0.6 (-1.1)        | 86 (+5.3)          | 801 (+0.2)            | 51 (-10.9)         |
| O'Brien       | 1480           | 43 (20)    | 1438 (0)              | 97        | 0.7 (+14.9)       | 78 (+2.9)          | 1360 (-0.2)           | 22 (-1.1)          |
| Osceola       | 1029           | 38 (17)    | 995 (0)               | 97        | 0.8 (+1.9)        | 52 (+5.0)          | 943 (-0.3)            | 20 (-2.5)          |
| Page          | 1375           | 38 (15)    | 1272 (0)              | 93        | 0.3 (+33.5)       | 69 (+0.8)          | 1203 (0)              | 18 (-4.3)          |
| Palo Alto     | 1453           | 37 (24)    | 1404 (-0.1)           | 97        | 1.4 (+12.0)       | 67 (+2.1)          | 1335 (-0.2)           | 14 (-4.1)          |
| Plymouth      | 2213           | 31 (17)    | 1955 (+1.7)           | 88        | 1.1 (+9.7)        | 112 (+4.6)         | 1842 (+1.5)           | 199 (-14.1)        |
| Pocahontas    | 1491           | 41 (24)    | 1464 (0)              | 98        | 1.3 (+20.5)       | 69 (+1.1)          | 1394 (-0.1)           | 10 (-7.0)          |
| Polk          | 1376           | 34 (18)    | 1197 (+0.3)           | 87        | 4.0 (+17.7)       | 370 (+25.4)        | 823 (-8.0)            | 26 (+1.9)          |
| Pottawattamie | 2449           | 33 (16)    | 2267 (+0.3)           | 93        | 4.1 (+314.5)      | 190 (+6.4)         | 2073 (-0.4)           | 68 (-3.3)          |
| Poweshiek     | 1509           | 31 (14)    | 1421 (+0.7)           | 94        | 0.2 (-10.1)       | 80 (+1.6)          | 1341 (+0.7)           | 30 (-26.7)         |
| Ringgold      | 1377           | 29 (13)    | 1196 (-0.4)           | 87        | 0.3 (-1.7)        | 55 (+0.6)          | 1141 (-0.5)           | 7 (+48.6)          |
| Sac           | 1482           | 39 (19)    | 1450 (0)              | 98        | 0.8 (-18.7)       | 77 (+5.4)          | 1373 (-0.3)           | 9 (-7.0)           |
| Scott         | 1111           | 31 (16)    | 986 (+0.6)            | 89        | 0.6 (-37.2)       | 147 (+13.5)        | 839 (-1.3)            | 16 (-20.0)         |
| Shelby        | 1527           | 28 (17)    | 1504 (+0.2)           | 98        | 0.3 (+0.6)        | 70 (+1.3)          | 1434 (+0.1)           | 11 (-21.8)         |
| Sioux         | 1973           | 37 (21)    | 1904 (+0.2)           | 96        | 2.6 (-5.3)        | 123 (+5.2)         | 1778 (-0.1)           | 43 (-8.8)          |
| Story         | 1474           | 36 (20)    | 1394 (+0.1)           | 95        | 0.4 (+2.0)        | 134 (+10.8)        | 1260 (-0.9)           | 16 (-9.2)          |
| Tama          | 1853           | 34 (21)    | 1640 (+0.5)           | 89        | 0.3 (+5.3)        | 89 (+2.6)          | 1551 (+0.3)           | 41 (-12.7)         |
| Taylor        | 1372           | 29 (12)    | 1203 (-0.1)           | 88        | 0.1 (0)           | 57 (+0.2)          | 1146 (-0.1)           | 11 (+11.1)         |
| Union         | 1082           | 33 (13)    | 958 (-0.2)            | 88        | 0.3 (-3.7)        | 54 (+1.0)          | 903 (-0.3)            | 5 (+61.9)          |
| Van Buren     | 1239           | 20 (11)    | 828 (-0.5)            | 67        | 0.7 (+30.1)       | 52 (+0.1)          | 776 (-0.5)            | 14 (+13.6)         |
| Wapello       | 1101           | 24 (11)    | 839 (-0.2)            | 76        | 1.3 (+132.8)      | 81 (+6.4)          | 757 (-1.0)            | 12 (+30.2)         |
| Warren        | 1415           | 30 (15)    | 1126 (-0.2)           | 80        | 1.5 (+101.8)      | 91 (+8.1)          | 1033 (-0.9)           | 18 (+13.1)         |
| Washington    | 1464           | 27 (16)    | 1226 (+0.2)           | 84        | 0.7 (+51.4)       | 79 (+2.2)          | 1146 (0)              | 57 (-3.2)          |
| Wayne         | 1356           | 27 (13)    | 1153 (-0.3)           | 85        | 0.4 (+1858.3)     | 54 (+0.2)          | 1099 (-0.4)           | 7 (+140.6)         |
| Webster       | 1809           | 38 (19)    | 1669 (0)              | 92        | 1.2 (-16.9)       | 101 (+6.0)         | 1567 (-0.3)           | 19 (-4.7)          |
| Winnebago     | 1032           | 37 (24)    | 981 (+0.3)            | 95        | 0.6 (+8.1)        | 53 (+1.2)          | 928 (+0.3)            | 17 (-18.7)         |
| Winneshiek    | 1761           | 20 (11)    | 1456 (+0.8)           | 83        | 0.6 (-1.9)        | 86 (+1.6)          | 1370 (+0.7)           | 63 (-15.8)         |
| Woodbury      | 2207           | 25 (14)    | 1957 (+3.1)           | 89        | 2.3 (+147.0)      | 155 (+5.0)         | 1800 (+2.9)           | 153 (-27.0)        |
| Worth         | 1026           | 34 (16)    | 965 (+0.2)            | 94        | 0.2 (+3.8)        | 49 (+3.4)          | 915 (0)               | 21 (-8.9)          |
| Wright        | 1491           | 37 (21)    | 1433 (+0.1)           | 96        | 0.9 (-24.5)       | 73 (+2.4)          | 1359 (0)              | 20 (-9.3)          |
| <b>Total</b>  | <b>142,801</b> | <b>n/a</b> | <b>126,573 (+0.2)</b> | <b>89</b> | <b>95 (+42.8)</b> | <b>8386 (+4.9)</b> | <b>118,092 (-0.1)</b> | <b>2837 (-8.9)</b> |

Note: Anthropogenically degraded land was calculated as a sum of degraded land from agriculture (hay/pasture, and cultivated crops), from development (developed, open space; developed, low intensity; developed, medium intensity; developed, high intensity), and barren land. Developed land includes categories: developed, open space; developed, low intensity; developed, medium intensity; developed, high intensity. Agriculture includes categories: hay/pasture; and cultivated crops. Potential land for nature-based solutions (NBS) is limited to barren land, shrub/scrub, and herbaceous land cover classes, to provide potential land

areas without impacting current land uses. Average carbon index (CI, the standard deviation is given in parentheses) of mineral soils for each county in Iowa was obtained from Al-Kaisi et al., 2012 [36]. Change in the area was calculated as follows:  $((2016 \text{ Area} - 2001 \text{ Area}) / 2001 \text{ Area}) \times 100\%$ .

**Table S6.** Developed land and potential for realized social costs of carbon (C) due to complete loss of total soil carbon (TSC) of developed land by soil order in the state of Iowa (IA) (USA) prior and through 2016.

| Parameter                                           | Total                | Degree of Weathering and Soil Development |                      |                   |                      |                      |                   |
|-----------------------------------------------------|----------------------|-------------------------------------------|----------------------|-------------------|----------------------|----------------------|-------------------|
|                                                     |                      | Slight                                    |                      |                   | Moderate             |                      |                   |
|                                                     |                      | Entisols                                  | Inceptisols          | Histosols         | Alfisols             | Mollisols            | Vertisols         |
| <b>Developed, open space (km<sup>2</sup>)</b>       | 5038.9               | 350.7                                     | 408.5                | 2.3               | 1082.3               | 3185.3               | 9.9               |
| <b>Total soil carbon (TSC):</b>                     |                      |                                           |                      |                   |                      |                      |                   |
| Minimum (kg)                                        | $4.2 \times 10^{10}$ | $1.3 \times 10^9$                         | $2.2 \times 10^9$    | $1.5 \times 10^8$ | $3.9 \times 10^9$    | $3.4 \times 10^{10}$ | $1.5 \times 10^8$ |
| Midpoint (kg)                                       | $1.0 \times 10^{11}$ | $4.5 \times 10^9$                         | $5.7 \times 10^9$    | $3.3 \times 10^8$ | $1.3 \times 10^{10}$ | $8.0 \times 10^{10}$ | $3.7 \times 10^8$ |
| Maximum (kg)                                        | $1.8 \times 10^{11}$ | $8.5 \times 10^9$                         | $1.1 \times 10^{10}$ | $5.7 \times 10^8$ | $2.4 \times 10^{10}$ | $1.4 \times 10^{11}$ | $6.3 \times 10^8$ |
| Minimum (SC-CO <sub>2</sub> , \$, USD)              | $7.1 \times 10^9$    | $2.2 \times 10^8$                         | $3.6 \times 10^8$    | $2.5 \times 10^7$ | $6.6 \times 10^8$    | $5.8 \times 10^9$    | $2.6 \times 10^7$ |
| Midpoint (SC-CO <sub>2</sub> , \$, USD)             | $1.7 \times 10^{10}$ | $7.6 \times 10^8$                         | $9.6 \times 10^8$    | $5.5 \times 10^7$ | $2.2 \times 10^9$    | $1.3 \times 10^{10}$ | $6.3 \times 10^7$ |
| Maximum (SC-CO <sub>2</sub> , \$, USD)              | $3.0 \times 10^{10}$ | $1.4 \times 10^9$                         | $1.8 \times 10^9$    | $9.6 \times 10^7$ | $4.0 \times 10^9$    | $2.3 \times 10^{10}$ | $1.1 \times 10^8$ |
| <b>Developed, medium intensity (km<sup>2</sup>)</b> | 686.4                | 85.7                                      | 51.2                 | 0.2               | 110.6                | 438.4                | 0.3               |
| <b>Total soil carbon (TSC):</b>                     |                      |                                           |                      |                   |                      |                      |                   |
| Minimum (kg)                                        | $5.7 \times 10^9$    | $3.2 \times 10^8$                         | $2.7 \times 10^8$    | $1.3 \times 10^7$ | $4.0 \times 10^8$    | $4.7 \times 10^9$    | $4.7 \times 10^6$ |
| Midpoint (kg)                                       | $1.4 \times 10^{10}$ | $1.1 \times 10^9$                         | $7.2 \times 10^8$    | $2.9 \times 10^7$ | $1.3 \times 10^9$    | $1.1 \times 10^{10}$ | $1.1 \times 10^7$ |
| Maximum (kg)                                        | $2.5 \times 10^{10}$ | $2.1 \times 10^9$                         | $1.3 \times 10^9$    | $5.0 \times 10^7$ | $2.5 \times 10^9$    | $1.9 \times 10^{10}$ | $1.9 \times 10^7$ |
| Minimum (SC-CO <sub>2</sub> , \$, USD)              | $9.7 \times 10^8$    | $5.3 \times 10^7$                         | $4.6 \times 10^7$    | $2.2 \times 10^6$ | $6.7 \times 10^7$    | $8.0 \times 10^8$    | $7.9 \times 10^5$ |
| Midpoint (SC-CO <sub>2</sub> , \$, USD)             | $2.4 \times 10^9$    | $1.9 \times 10^8$                         | $1.2 \times 10^8$    | $4.8 \times 10^6$ | $2.2 \times 10^8$    | $1.8 \times 10^9$    | $1.9 \times 10^6$ |
| Maximum (SC-CO <sub>2</sub> , \$, USD)              | $4.1 \times 10^9$    | $3.5 \times 10^8$                         | $2.2 \times 10^8$    | $8.5 \times 10^6$ | $4.1 \times 10^8$    | $3.1 \times 10^9$    | $3.2 \times 10^6$ |
| <b>Developed, low intensity (km<sup>2</sup>)</b>    | 2475.9               | 187.9                                     | 165.8                | 1.0               | 614.9                | 1504.9               | 1.4               |
| <b>Total soil carbon (TSC):</b>                     |                      |                                           |                      |                   |                      |                      |                   |
| Minimum (kg)                                        | $2.0 \times 10^{10}$ | $7.0 \times 10^8$                         | $8.8 \times 10^8$    | $6.2 \times 10^7$ | $2.2 \times 10^9$    | $1.6 \times 10^{10}$ | $2.3 \times 10^7$ |
| Midpoint (kg)                                       | $5.0 \times 10^{10}$ | $2.4 \times 10^9$                         | $2.3 \times 10^9$    | $1.4 \times 10^8$ | $7.3 \times 10^9$    | $3.8 \times 10^{10}$ | $5.5 \times 10^7$ |
| Maximum (kg)                                        | $8.7 \times 10^{10}$ | $4.5 \times 10^9$                         | $4.3 \times 10^9$    | $2.4 \times 10^8$ | $1.4 \times 10^{10}$ | $6.4 \times 10^{10}$ | $9.2 \times 10^7$ |
| Minimum (SC-CO <sub>2</sub> , \$, USD)              | $3.4 \times 10^9$    | $1.2 \times 10^8$                         | $1.5 \times 10^8$    | $1.0 \times 10^7$ | $3.8 \times 10^8$    | $2.7 \times 10^9$    | $3.8 \times 10^6$ |
| Midpoint (SC-CO <sub>2</sub> , \$, USD)             | $8.4 \times 10^9$    | $4.1 \times 10^8$                         | $3.9 \times 10^8$    | $2.3 \times 10^7$ | $1.2 \times 10^9$    | $6.3 \times 10^9$    | $9.2 \times 10^6$ |
| Maximum (SC-CO <sub>2</sub> , \$, USD)              | $1.5 \times 10^{10}$ | $7.7 \times 10^8$                         | $7.2 \times 10^8$    | $4.0 \times 10^7$ | $2.3 \times 10^9$    | $1.1 \times 10^{10}$ | $1.6 \times 10^7$ |
| <b>Developed, high intensity (km<sup>2</sup>)</b>   | 184.8                | 34.3                                      | 9.7                  | 0.0               | 22.5                 | 118.2                | 0.05              |
| <b>Total soil carbon (TSC):</b>                     |                      |                                           |                      |                   |                      |                      |                   |
| Minimum (kg)                                        | $1.5 \times 10^9$    | $1.3 \times 10^8$                         | $5.1 \times 10^7$    | $2.4 \times 10^6$ | $8.1 \times 10^7$    | $1.3 \times 10^9$    | $7.8 \times 10^5$ |
| Midpoint (kg)                                       | $3.8 \times 10^9$    | $4.4 \times 10^8$                         | $1.4 \times 10^8$    | $5.4 \times 10^6$ | $2.7 \times 10^8$    | $3.0 \times 10^9$    | $1.9 \times 10^6$ |
| Maximum (kg)                                        | $6.6 \times 10^9$    | $8.3 \times 10^8$                         | $2.5 \times 10^8$    | $9.4 \times 10^6$ | $5.0 \times 10^8$    | $5.0 \times 10^9$    | $3.2 \times 10^6$ |
| Minimum (SC-CO <sub>2</sub> , \$, USD)              | $2.6 \times 10^8$    | $2.1 \times 10^7$                         | $8.6 \times 10^6$    | $4.1 \times 10^5$ | $1.4 \times 10^7$    | $2.2 \times 10^8$    | $1.3 \times 10^5$ |
| Midpoint (SC-CO <sub>2</sub> , \$, USD)             | $6.4 \times 10^8$    | $7.5 \times 10^7$                         | $2.3 \times 10^7$    | $9.1 \times 10^5$ | $4.5 \times 10^7$    | $5.0 \times 10^8$    | $3.2 \times 10^5$ |
| Maximum (SC-CO <sub>2</sub> , \$, USD)              | $1.1 \times 10^9$    | $1.4 \times 10^8$                         | $4.2 \times 10^7$    | $1.6 \times 10^6$ | $8.4 \times 10^7$    | $8.5 \times 10^8$    | $5.3 \times 10^5$ |
| <b>Total area (km<sup>2</sup>)</b>                  | 8385.9               | 658.6                                     | 635.2                | 3.5               | 1830.3               | 5246.7               | 11.7              |
| <b>Total soil carbon (TSC):</b>                     |                      |                                           |                      |                   |                      |                      |                   |
| Minimum (kg)                                        | $6.9 \times 10^{10}$ | $2.4 \times 10^9$                         | $3.4 \times 10^9$    | $2.3 \times 10^8$ | $6.6 \times 10^9$    | $5.7 \times 10^{10}$ | $1.8 \times 10^8$ |
| Midpoint (kg)                                       | $1.7 \times 10^{11}$ | $8.4 \times 10^9$                         | $8.9 \times 10^9$    | $5.0 \times 10^8$ | $2.2 \times 10^{10}$ | $1.3 \times 10^{11}$ | $4.4 \times 10^8$ |
| Maximum (kg)                                        | $3.0 \times 10^{11}$ | $1.6 \times 10^{10}$                      | $1.6 \times 10^{10}$ | $8.7 \times 10^8$ | $4.1 \times 10^{10}$ | $2.2 \times 10^{11}$ | $7.4 \times 10^8$ |
| Minimum (SC-CO <sub>2</sub> , \$, USD)              | $1.2 \times 10^{10}$ | $4.1 \times 10^8$                         | $5.7 \times 10^8$    | $3.8 \times 10^7$ | $1.1 \times 10^9$    | $9.5 \times 10^9$    | $3.1 \times 10^7$ |
| Midpoint (SC-CO <sub>2</sub> , \$, USD)             | $2.9 \times 10^{10}$ | $1.4 \times 10^9$                         | $1.5 \times 10^9$    | $8.4 \times 10^7$ | $3.6 \times 10^9$    | $2.2 \times 10^{10}$ | $7.4 \times 10^7$ |
| Maximum (SC-CO <sub>2</sub> , \$, USD)              | $5.0 \times 10^{10}$ | $2.7 \times 10^9$                         | $2.8 \times 10^9$    | $1.5 \times 10^8$ | $6.8 \times 10^9$    | $3.8 \times 10^{10}$ | $1.3 \times 10^8$ |

**Table S7.** Increases in developed land and potential for realized social costs of carbon (C) due to complete loss of total soil carbon (TSC) of developed land by soil order in the state of Iowa (IA) (USA) from 2001 to 2016.

| Parameter                                           | Total                | Degree of Weathering and Soil Development |                   |                   |                   |                   |           |
|-----------------------------------------------------|----------------------|-------------------------------------------|-------------------|-------------------|-------------------|-------------------|-----------|
|                                                     |                      | Slight                                    |                   |                   | Moderate          |                   |           |
|                                                     |                      | Entisols                                  | Inceptisols       | Histosols         | Alfisols          | Mollisols         | Vertisols |
| <b>Developed, open space (km<sup>2</sup>)</b>       | 85.8                 | 5.1                                       | 13.6              | 0.0               | 21.2              | 45.9              | 0.0       |
| <b>Total soil carbon (TSC):</b>                     |                      |                                           |                   |                   |                   |                   |           |
| Minimum (kg)                                        | $6.6 \times 10^8$    | $1.9 \times 10^7$                         | $7.2 \times 10^7$ | $1.0 \times 10^6$ | $7.6 \times 10^7$ | $5.0 \times 10^8$ | 0.0       |
| Midpoint (kg)                                       | $1.7 \times 10^9$    | $6.5 \times 10^7$                         | $1.9 \times 10^8$ | 0.0               | $2.5 \times 10^8$ | $1.1 \times 10^9$ | 0.0       |
| Maximum (kg)                                        | $2.9 \times 10^9$    | $1.2 \times 10^8$                         | $3.5 \times 10^8$ | $4.6 \times 10^6$ | $4.7 \times 10^8$ | $2.0 \times 10^9$ | 0.0       |
| Minimum (SC-CO <sub>2</sub> , \$, USD)              | $1.1 \times 10^8$    | $3.2 \times 10^6$                         | $1.2 \times 10^7$ | $1.8 \times 10^5$ | $1.3 \times 10^7$ | $8.4 \times 10^7$ | 0.0       |
| Midpoint (SC-CO <sub>2</sub> , \$, USD)             | $2.8 \times 10^8$    | $1.1 \times 10^7$                         | $3.2 \times 10^7$ | $3.9 \times 10^5$ | $4.2 \times 10^7$ | $1.9 \times 10^8$ | 0.0       |
| Maximum (SC-CO <sub>2</sub> , \$, USD)              | $4.9 \times 10^8$    | $2.1 \times 10^7$                         | $5.9 \times 10^7$ | $6.8 \times 10^5$ | $7.9 \times 10^7$ | $3.3 \times 10^8$ | 0.0       |
| <b>Developed, medium intensity (km<sup>2</sup>)</b> | 153.4                | 16.6                                      | 18.9              | 0.0               | 22.3              | 95.5              | 0.0       |
| <b>Total soil carbon (TSC):</b>                     |                      |                                           |                   |                   |                   |                   |           |
| Minimum (kg)                                        | $1.3 \times 10^9$    | $6.2 \times 10^7$                         | $1.0 \times 10^8$ | $1.6 \times 10^6$ | $8.0 \times 10^7$ | $1.0 \times 10^9$ | 0.0       |
| Midpoint (kg)                                       | $3.1 \times 10^9$    | $2.1 \times 10^8$                         | $2.6 \times 10^8$ | 0.0               | $2.6 \times 10^8$ | $2.4 \times 10^9$ | 0.0       |
| Maximum (kg)                                        | $5.4 \times 10^9$    | $4.0 \times 10^8$                         | $4.9 \times 10^8$ | $6.0 \times 10^6$ | $5.0 \times 10^8$ | $4.1 \times 10^9$ | 0.0       |
| Minimum (SC-CO <sub>2</sub> , \$, USD)              | $2.1 \times 10^8$    | $1.0 \times 10^7$                         | $1.7 \times 10^7$ | $2.6 \times 10^5$ | $1.4 \times 10^7$ | $1.7 \times 10^8$ | 0.0       |
| Midpoint (SC-CO <sub>2</sub> , \$, USD)             | $5.3 \times 10^8$    | $3.6 \times 10^7$                         | $4.5 \times 10^7$ | $5.8 \times 10^5$ | $4.4 \times 10^7$ | $4.0 \times 10^8$ | 0.0       |
| Maximum (SC-CO <sub>2</sub> , \$, USD)              | $9.2 \times 10^8$    | $6.8 \times 10^7$                         | $8.2 \times 10^7$ | $1.0 \times 10^6$ | $8.3 \times 10^7$ | $6.8 \times 10^8$ | 0.0       |
| <b>Developed, low intensity (km<sup>2</sup>)</b>    | 104.0                | 6.8                                       | 16.6              | 0.0               | 21.7              | 58.8              | 0.0       |
| <b>Total soil carbon (TSC):</b>                     |                      |                                           |                   |                   |                   |                   |           |
| Minimum (kg)                                        | $8.3 \times 10^8$    | $2.5 \times 10^7$                         | $8.8 \times 10^7$ | $2.0 \times 10^6$ | $7.8 \times 10^7$ | $6.3 \times 10^8$ | 0.0       |
| Midpoint (kg)                                       | $2.0 \times 10^9$    | $8.7 \times 10^7$                         | $2.3 \times 10^8$ | 0.0               | $2.6 \times 10^8$ | $1.5 \times 10^9$ | 0.0       |
| Maximum (kg)                                        | $3.6 \times 10^9$    | $1.6 \times 10^8$                         | $4.3 \times 10^8$ | $7.6 \times 10^6$ | $4.8 \times 10^8$ | $2.5 \times 10^9$ | 0.0       |
| Minimum (SC-CO <sub>2</sub> , \$, USD)              | $1.4 \times 10^8$    | $4.2 \times 10^6$                         | $1.5 \times 10^7$ | $3.3 \times 10^5$ | $1.3 \times 10^7$ | $1.1 \times 10^8$ | 0.0       |
| Midpoint (SC-CO <sub>2</sub> , \$, USD)             | $3.5 \times 10^8$    | $1.5 \times 10^7$                         | $3.9 \times 10^7$ | $7.4 \times 10^5$ | $4.3 \times 10^7$ | $2.5 \times 10^8$ | 0.0       |
| Maximum (SC-CO <sub>2</sub> , \$, USD)              | $6.0 \times 10^8$    | $2.8 \times 10^7$                         | $7.2 \times 10^7$ | $1.3 \times 10^6$ | $8.1 \times 10^7$ | $4.2 \times 10^8$ | 0.0       |
| <b>Developed, high intensity (km<sup>2</sup>)</b>   | 52.2                 | 8.6                                       | 4.4               | 0.0               | 6.4               | 32.8              | 0.0       |
| <b>Total soil carbon (TSC):</b>                     |                      |                                           |                   |                   |                   |                   |           |
| Minimum (kg)                                        | $4.3 \times 10^8$    | $3.2 \times 10^7$                         | $2.3 \times 10^7$ | $1.2 \times 10^6$ | $2.3 \times 10^7$ | $3.5 \times 10^8$ | 0.0       |
| Midpoint (kg)                                       | $1.1 \times 10^9$    | $1.1 \times 10^8$                         | $6.2 \times 10^7$ | 0.0               | $7.6 \times 10^7$ | $8.2 \times 10^8$ | 0.0       |
| Maximum (kg)                                        | $1.9 \times 10^9$    | $2.1 \times 10^8$                         | $1.1 \times 10^8$ | $4.7 \times 10^6$ | $1.4 \times 10^8$ | $1.4 \times 10^9$ | 0.0       |
| Minimum (SC-CO <sub>2</sub> , \$, USD)              | $7.3 \times 10^7$    | $5.3 \times 10^6$                         | $3.9 \times 10^6$ | $2.1 \times 10^5$ | $3.9 \times 10^6$ | $6.0 \times 10^7$ | 0.0       |
| Midpoint (SC-CO <sub>2</sub> , \$, USD)             | $1.8 \times 10^8$    | $1.9 \times 10^7$                         | $1.0 \times 10^7$ | $4.5 \times 10^5$ | $1.3 \times 10^7$ | $1.4 \times 10^8$ | 0.0       |
| Maximum (SC-CO <sub>2</sub> , \$, USD)              | $3.1 \times 10^8$    | $3.5 \times 10^7$                         | $1.9 \times 10^7$ | $7.9 \times 10^5$ | $2.4 \times 10^7$ | $2.3 \times 10^8$ | 0.0       |
| <b>Total area (km<sup>2</sup>)</b>                  | 395.4                | 37.1                                      | 53.5              | 0.0               | 71.6              | 232.9             | 0.0       |
| <b>Total soil carbon (TSC):</b>                     |                      |                                           |                   |                   |                   |                   |           |
| Minimum (kg)                                        | $3.2 \times 10^9$    | $1.4 \times 10^8$                         | $2.8 \times 10^8$ | $5.8 \times 10^6$ | $2.6 \times 10^8$ | $2.5 \times 10^9$ | 0.0       |
| Midpoint (kg)                                       | $7.9 \times 10^9$    | $4.8 \times 10^8$                         | $7.5 \times 10^8$ | 0.0               | $8.5 \times 10^8$ | $5.8 \times 10^9$ | 0.0       |
| Maximum (kg)                                        | $1.4 \times 10^{10}$ | $9.0 \times 10^8$                         | $1.4 \times 10^9$ | $2.2 \times 10^7$ | $1.6 \times 10^9$ | $9.9 \times 10^9$ | 0.0       |
| Minimum (SC-CO <sub>2</sub> , \$, USD)              | $5.4 \times 10^8$    | $2.3 \times 10^7$                         | $4.8 \times 10^7$ | $9.8 \times 10^5$ | $4.4 \times 10^7$ | $4.2 \times 10^8$ | 0.0       |
| Midpoint (SC-CO <sub>2</sub> , \$, USD)             | $1.3 \times 10^9$    | $8.1 \times 10^7$                         | $1.3 \times 10^8$ | $2.2 \times 10^6$ | $1.4 \times 10^8$ | $9.8 \times 10^8$ | 0.0       |
| Maximum (SC-CO <sub>2</sub> , \$, USD)              | $2.3 \times 10^9$    | $1.5 \times 10^8$                         | $2.3 \times 10^8$ | $3.8 \times 10^6$ | $2.7 \times 10^8$ | $1.7 \times 10^9$ | 0.0       |

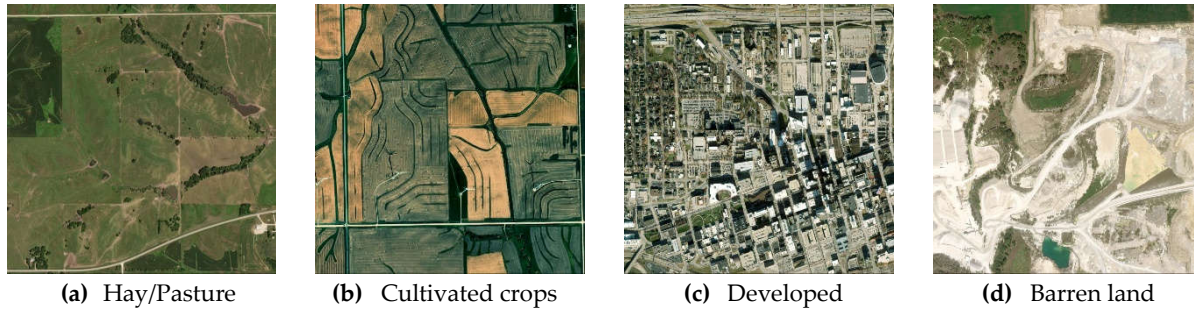

**Figure S1.** High-resolution aerial photos showing examples of land classes (LULC) which were used to determine anthropogenically degraded land (LD) in the state of Iowa (IA) (USA) by assuming that degraded lands are represented by the land classes (LULC) for agriculture (hay/pasture, and cultivated crops), development (developed, open space; developed, low intensity; developed, medium intensity; developed, high intensity) and barren lands. Representative examples were located using a land cover map of the contiguous United States of America (USA) for 2016 (based on data from the Multi-Resolution Land Characteristics Consortium (MRLC) with detailed descriptions of the land classes [30]).

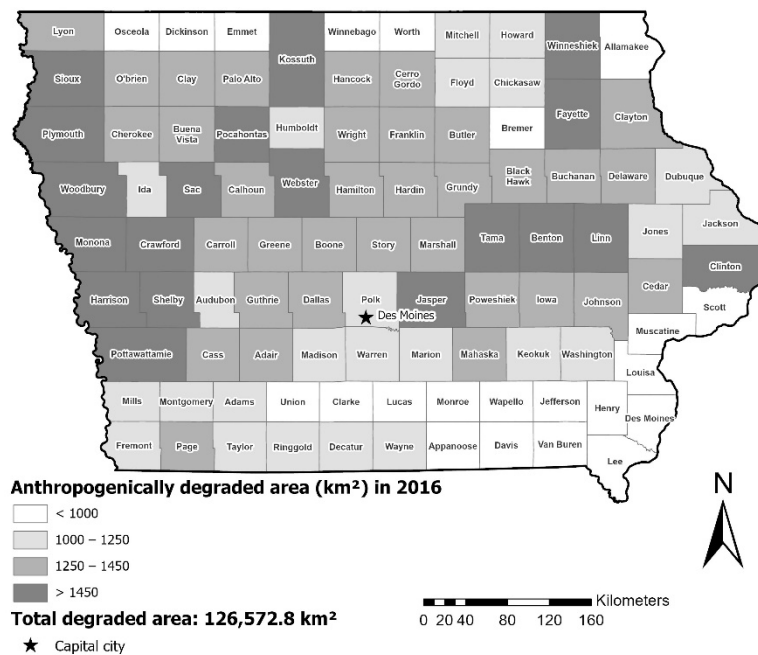

**Figure S2.** Anthropogenic land degradation status is presented as the total degraded land area (km<sup>2</sup>) in the state of Iowa (IA) (USA) in 2016. Anthropogenically degraded land was calculated as a sum of degraded land from agriculture (hay/pasture, and cultivated crops), from development (developed, open space; developed, low intensity; developed, medium intensity; developed, high intensity), and barren land.

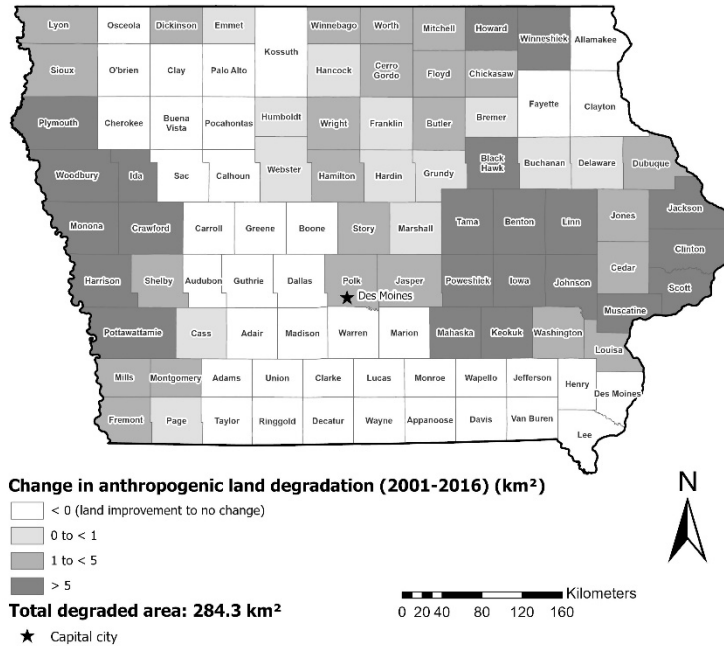

**Figure S3.** Change in anthropogenic land degradation status is presented as the total degraded land area (km<sup>2</sup>) over time (2001–2016) by county in the state of Iowa (IA) (USA). Anthropogenically degraded land was calculated as a sum of degraded land from agriculture (hay/pasture, and cultivated crops), from development (developed, open space; developed, low intensity; developed, medium intensity; developed, high intensity), and barren land.

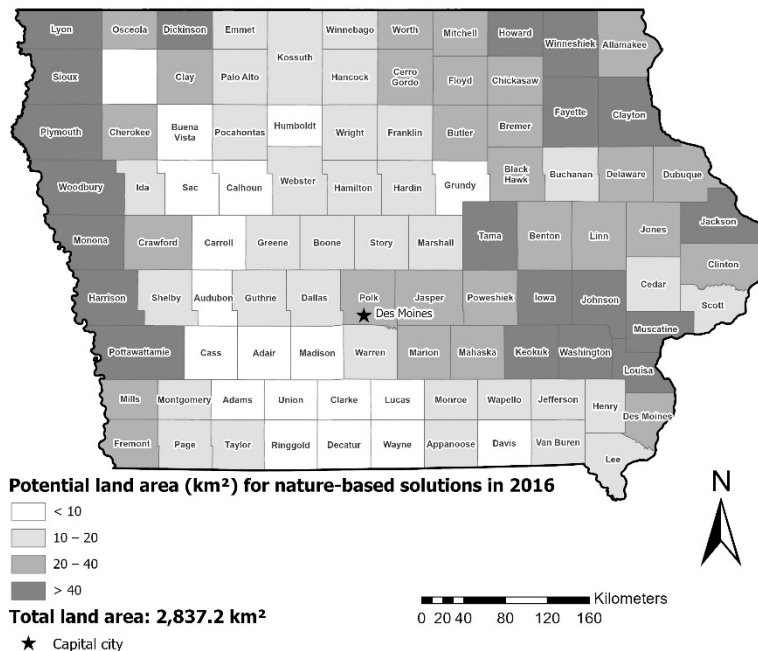

**Figure S4.** The status of potential land for nature-based solutions (NBS) is presented as the proportion of potential NBS land over the total land area (%) by county in the state of Iowa (IA) (USA). Potential land for NBS is limited to barren land, shrub/scrub, and herbaceous land cover classes, to provide potential land areas without impacting current land uses.



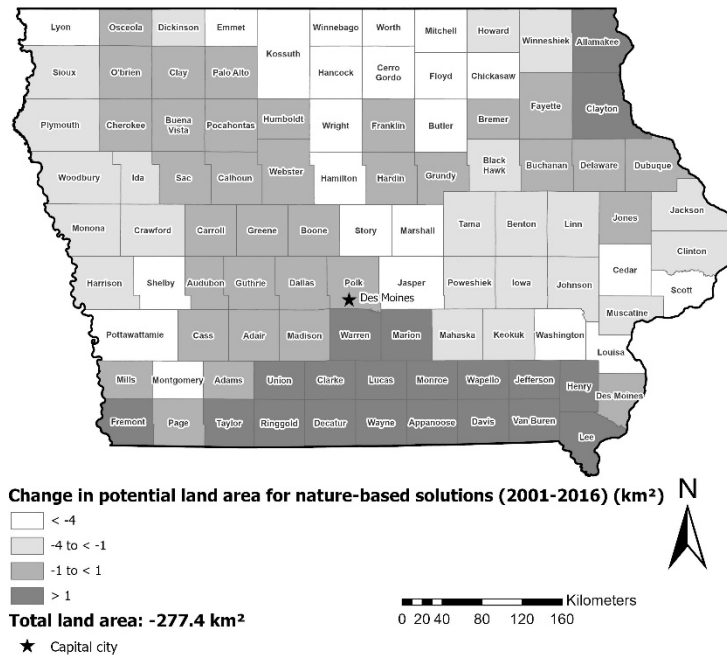

**Figure S5.** Change in the status of potential land area for nature-based solutions (NBS) (km<sup>2</sup>) over time (2001-2016) by county in the state of Iowa (IA) (USA). Potential land for NBS is limited to barren land, shrub/scrub, and herbaceous land cover classes, to provide potential land areas without impacting current land uses.

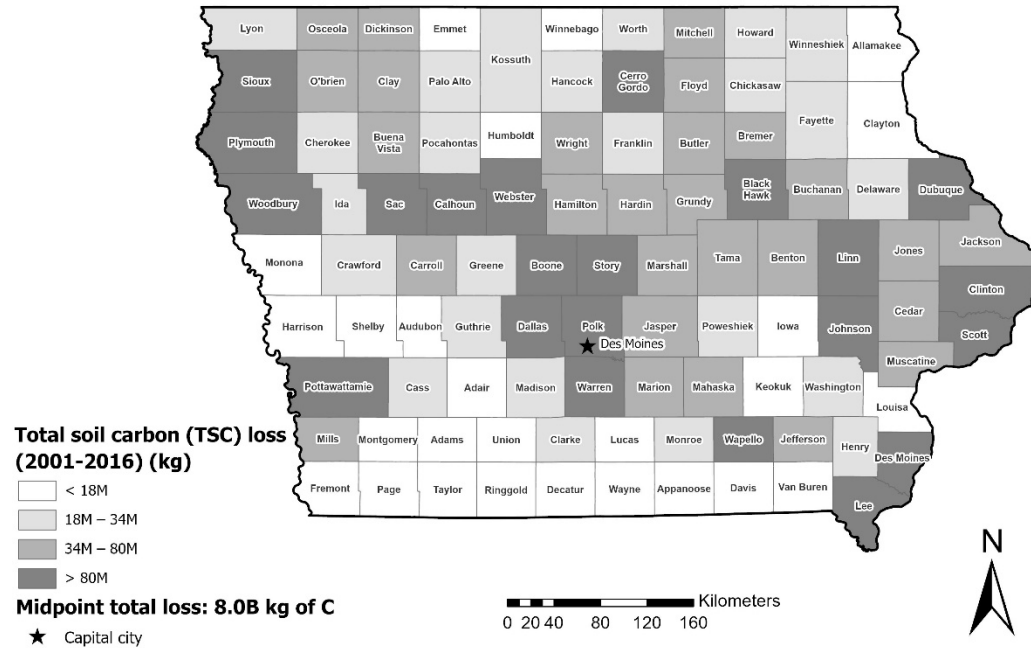

**Figure S6.** Damage to soil quality because of soil carbon (C) loss with associated emissions from more recent land developments between 2001 and 2016 in Iowa (IA) (USA). Note: M = million = 10<sup>6</sup>, B = billion = 10<sup>9</sup>.

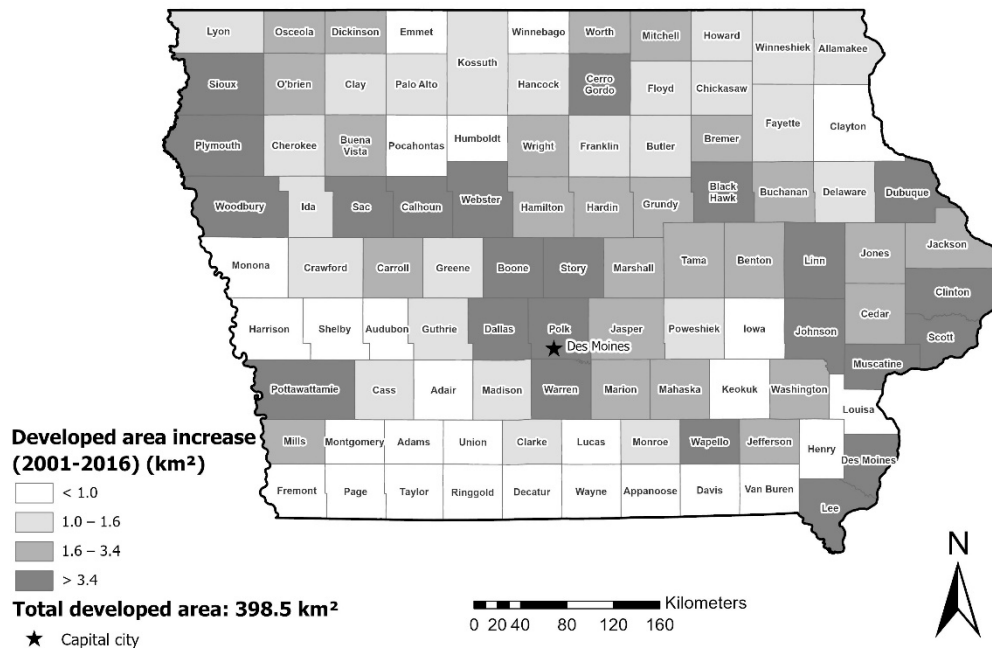

**Figure S7.** Damages to soil quality because of loss of land for potential soil carbon (C) sequestration from land developments that occurred between 2001 and 2016 for Iowa (IA) (USA).

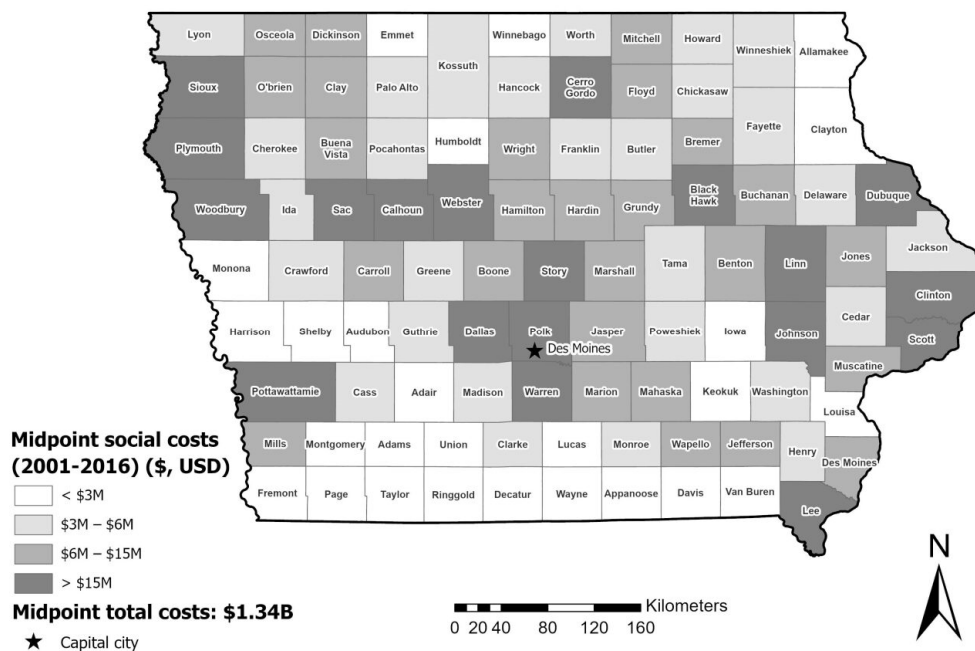

**Figure S8.** Damage to soil quality (SQ) from emissions can be measured as “realized” social costs of soil carbon (C) (SC-CO<sub>2</sub>) from recent land developments in the state of Iowa (IA) (USA) from 2001 to 2016. Note: M = million = 10<sup>6</sup>, B = billion = 10<sup>9</sup>.
